# Supplementary material for: A 1,1′-ferrocenyl phosphine-borane: synthesis, structure and evaluation in Rh-catalyzed hydroformylation
Source: Royal Society of Chemistry journal article supplement (doi:10.1039/c0nj00117a), 2010-01-01
Supplement: c0nj00117a.pdf [file c0nj00117a.pdf]

# **A 1,1'-ferrocenyl phosphine-borane: synthesis, structure and evaluation in Rh-catalyzed hydroformylation**

Magnus W. P. Bebbington, Sébastien Bontemps, Ghenwa Bouhadir, Martin Hanton,  
Robert P. Tooze, Hendrik van Rensburg and Didier Bourissou\*

## **ELECTRONIC SUPPLEMENTARY INFORMATION**

### **Contents**

|                       |    |
|-----------------------|----|
| Selected Crystal Data | S2 |
| Catalytic Results     | S3 |

**Selected crystal data.** Crystallographic data (excluding structure factors) have been deposited with the Cambridge Crystallographic Data Centre as supplementary publication no. **CCDC-766316 (2)**. These data can be obtained free of charge via [www.ccdc.cam.ac.uk/conts/retrieving.html](http://www.ccdc.cam.ac.uk/conts/retrieving.html) (or from the CCDC, 12 Union Road, Cambridge CB2 1EZ, UK; fax: (+44) 1223-336-033; or [deposit@ccdc.cam.ac.uk](mailto:deposit@ccdc.cam.ac.uk)).

**2:** C<sub>40</sub>H<sub>40</sub>BFeP, *M* = 618.35, monoclinic, space group *P*2(1)/*c*, *a* = 8.2786(11), *b* = 42.999(5), *c* = 9.2730(12) Å,  $\alpha = 90^\circ$ ,  $\beta = 93.458(3)^\circ$ ,  $\gamma = 90^\circ$ , *V* = 3294.9(7) Å<sup>3</sup>, *Z* = 4, crystal size 0.2 x 0.1 x 0.07 mm<sup>3</sup>, 14541 reflections collected (4681 independent, *R*<sub>int</sub> = 0.1484), 394 parameters, *R*<sub>1</sub> [*I* > 2σ(*I*)] = 0.0756, *wR*<sub>2</sub> [all data] = 0.1269, GOF = 1.018, largest diff. peak and hole: 0.435 and -0.302 eÅ<sup>-3</sup>.

Data were collected at 173(2) K using an oil-coated shock-cooled crystal on a Bruker-AXS CCD 1000 diffractometer ( $\lambda = 0.71073$  Å). Semi-empirical absorption corrections were employed.<sup>1</sup> The structure was solved by direct methods (SHELXS-97),<sup>2</sup> and refined using the least-squares method on *F*<sup>2,3</sup>.

---

<sup>1</sup> SADABS, Program for data correction, Bruker-AXS.

<sup>2</sup> G. M. Sheldrick, *Acta Crystallogr.*, 1990, **A46**, 467.

<sup>3</sup> SHELXL-97, Program for Crystal Structure Refinement, G. M. Sheldrick, University of Göttingen, 1997.

## Catalytic Results

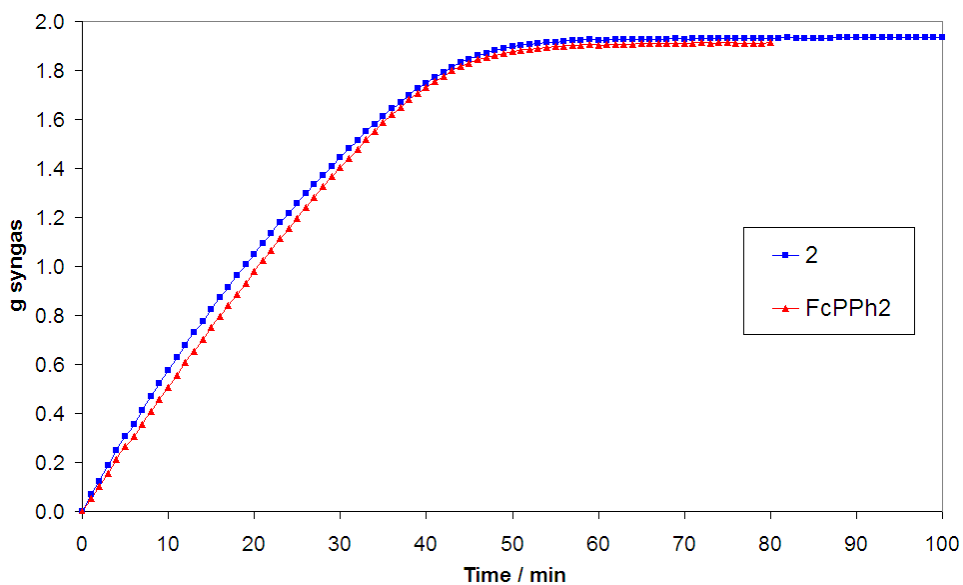

**Fig. S1** Uptake of syngas observed with the 1,1'-ferrocenyl phosphine-borane ligand **2** and the boron-free ligand FcPPh<sub>2</sub>.

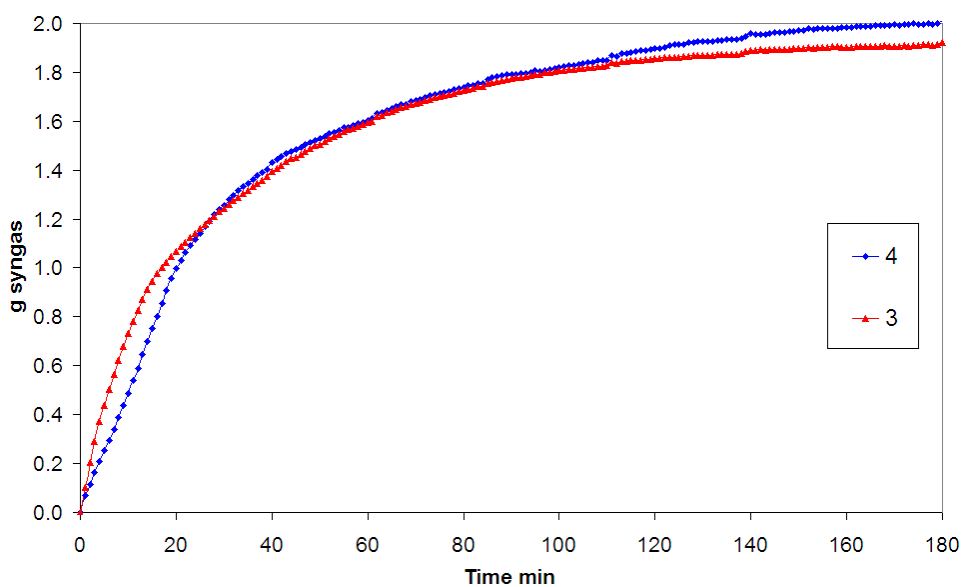

**Fig. S2** Uptake of syngas observed with the *ortho*-phenylene phosphine-borane ligand **3** and the sterically encumbered biaryldiphosphine ligand **4**.
